# Supplementary material for: Creativity and Connection: The Impact of inspirED with Secondary School Students
Source: MDPI journal article supplement (doi:10.3390/jintelligence11010008), 2022-12-31
Supplement: s1 [file s1]

Supplementary Table S1. Characteristics of Schools

|                                     | School 1    | School 2       | School 3       | School 4       | School 5         | School 6         | School 7          | School 8         | School 9         | School 10        | School 11        |
|-------------------------------------|-------------|----------------|----------------|----------------|------------------|------------------|-------------------|------------------|------------------|------------------|------------------|
| State                               | CO          | KY             | IN             | IN             | MO               | ND               | WV                | MI               | MI               | MI               | MI               |
| School Size                         | 111         | 720            | 653            | 542            | 716              | 75               | 314               | 2826             | 696              | 1524             | 1079             |
| Locale                              | Suburb      | City:<br>Small | City:<br>Small | City:<br>Small | Suburb:<br>Large | Town:<br>Distant | Rural:<br>Distant | Suburb:<br>Large | Suburb:<br>Large | Suburb:<br>Large | Suburb:<br>Large |
| School Type                         | Alternative | Public         | Public         | Public         | Public           | Public           | Public            | Public           | Public           | Public           | Private          |
| Free/reduced price lunch            | 64%         | 56%            | 56%            | 62%            | 36%              | 19%              | 63%               | 17%              | 19%              | 13%              | Not reported     |
| % Male                              | 62%         | 52%            | 51%            | 54%            | 49%              | 56%              | 48%               | 51%              | 50%              | 48%              | Not reported     |
| Grades served                       | 9-12        | 6-8            | 7-8            | 7-8            | 7-8              | 6-8              | PK-8              | 9-12             | 6-8              | 9-12             | PK-8             |
| Race/ethnicity                      |             |                |                |                |                  |                  |                   |                  |                  |                  |                  |
| African American or Black           | 7%          | 22%            | 19%            | 18%            | 8%               | 5%               | 0%                | 8%               | 1%               | 3%               | 3%               |
| American Indian or Alaska Native    | 1%          | 1%             | 0%             | 0%             | 1%               | 0%               | 0%                | 0%               | 0%               | 0%               | 0%               |
| Asian or Asian American             | 0%          | 4%             | 2%             | 1%             | 0%               | 3%               | 0%                | 3%               | 1%               | 43%              | 1%               |
| Biracial or Multiracial             | 5%          | 5%             | 9%             | 6%             | 9%               | 11%              | 1%                | 3%               | 3%               | 4%               | 1%               |
| Hispanic or Latin                   | 34%         | 19%            | 30%            | 51%            | 17%              | 13%              | 0%                | 4%               | 9%               | 3%               | 1%               |
| Native Hawaiian or Pacific Islander | 2%          | 0%             | 0%             | 0%             | 0%               | 0%               | 0%                | 0%               | 0%               | 0%               | 0%               |
| White or Caucasian                  | 51%         | 49%            | 40%            | 25%            | 65%              | 67%              | 99%               | 82%              | 85%              | 47%              | 94%              |

|                                     | School<br>12     | School<br>13     | School<br>14     | School<br>15    | School<br>16       | School<br>17     | School<br>18     | School<br>19     | School<br>20     | School<br>21    | School 22**      |
|-------------------------------------|------------------|------------------|------------------|-----------------|--------------------|------------------|------------------|------------------|------------------|-----------------|------------------|
| State                               | PA               | MI               | PA               | WV              | CT                 | NM               | CO               | MI               | CO               | MO              | KY               |
| School Size                         | 847              | 483              | 1682             | 733             | 790                | 610              | 1084             | 1178             | 473              | 584             | N/A              |
| Locale                              | Suburb:<br>Large | Rural:<br>Fringe | Suburb:<br>Large | Town:<br>Remote | Suburb:<br>Midsize | Rural:<br>Fringe | Suburb:<br>Large | Suburb:<br>Large | Rural:<br>Fringe | Town:<br>Fringe | Rural:<br>Remote |
| School Type                         | Public           | Public           | Public           | Public          | Public             | Public           | Public           | Public           | Public           | Public          | Public           |
| Free/reduced price lunch            | 33%              | 27%              | 23%              | 56%             | 20%                | 100%             | 49%              | 26%              | 12%              | 17%             | Not reported     |
| % Male / Female                     | 52%              | 53%              | 50%              | 51%             | 52%                | 52%              | 52%              | 50%              | 50%              | 51%             | Not reported     |
| Grades served                       | 7-8              | KG-8             | 9-12             | 5-8             | 5-8                | 7-8              | 6-8              | 6-8              | 6-8              | 6-7             | PK-8             |
| Race/ethnicity                      |                  |                  |                  |                 |                    |                  |                  |                  |                  |                 |                  |
| African American or Black           | 3%               | 1%               | 3%               | 0%              | 3%                 | 0%               | 9%               | 1%               | 1%               | 1%              | N/A              |
| American Indian or Alaska Native    | 0%               | 0%               | 0%               | 0%              | 1%                 | 0%               | 1%               | 0%               | 0%               | 0%              | N/A              |
| Asian or Asian American             | 3%               | 1%               | 4%               | 0%              | 8%                 | 0%               | 1%               | 1%               | 2%               | 0%              | N/A              |
| Biracial or Multiracial             | 4%               | 3%               | 4%               | 2%              | 1%                 | 0%               | 11%              | 3%               | 7%               | 3%              | N/A              |
| Hispanic or Latin                   | 10%              | 2%               | 9%               | 0%              | 14%                | 97%              | 27%              | 9%               | 9%               | 4%              | N/A              |
| Native Hawaiian or Pacific Islander | 0%               | 0%               | 0%               | 0%              | 0%                 | 0%               | 0%               | 0%               | 0%               | 0%              | N/A              |
| White or Caucasian                  | 79%              | 93%              | 81%              | 97%             | 74%                | 3%               | 49%              | 86%              | 81%              | 91%             | N/A              |

*Note.* School data is based on the NCES database; \*\*School 22 did not have a report of its 2021-22 student demographics

Supplementary Table S2. Formation of inspirED teams and their projects

| School        | State | New or Existing Group | inspirED Project                                                                                                                                                                                                                                   |
|---------------|-------|-----------------------|----------------------------------------------------------------------------------------------------------------------------------------------------------------------------------------------------------------------------------------------------|
| High School   | CO    | Existing              | To promote school spirit and inclusivity the team created a community mural where students could take their picture and post on social media with a school hashtag                                                                                 |
| Junior High   | KY    | New                   | To promote student-to-student relationships, teaching quality, and school pride, team created digital survey, raised funds, and designed hands-on learning day to give peers a screen break                                                        |
| Middle School | IN    | New                   | To promote social safety in response to unkindness on social media, created banners at the front entrance and content for morning announcements with messages of encouragement                                                                     |
| Middle School | IN    | Existing              | To promote multiculturalism, researched under-represented cultures and created posters to hang throughout the school                                                                                                                               |
| Middle School | MO    | Existing              | To improve peer-to-peer relationships, organized “Minute to Win It” challenges in advisory classes                                                                                                                                                 |
| Middle School | ND    | Existing              | To promote social and emotional safety, created a conversation booth at lunch times and invited students to come discuss issues like diversity, technology, self-awareness, and inclusion                                                          |
| PreK-8        | WV    | Unknown               | To promote school pride, created a positive newsletter with school events and updates and promoted through social media                                                                                                                            |
| High School   | MI    | Existing              | Wanting to improve relationships between students and students and adults, the team created a peer mentor and mediation group with virtual referral and access options                                                                             |
| Middle School | MI    | Existing              | To normalize struggles with mental health and provide resources, created a video about common sources of stress and ideas to manage stress                                                                                                         |
| High School   | MI    | New                   | To combat negativity on social media and high stress levels while promoting bonding, organized monthly fun events, a “get caught being kind” board, and researched the benefits of a “house system” and partnered with administration to implement |
| PreK-8        | MI    | New                   | To support their peers in feeling safe and welcome at school, hosted a graphic design contest to create posters with positive messages for school common areas                                                                                     |
| Middle School | PA    | New                   | To promote school spirit and give peers a break from screens, planned a screen-free “chill out day” with fun and interactive activities                                                                                                            |
| K-8           | MI    | Unknown               | To address social safety, social skills, and healthy technology use, created educational videos and shared on social media, school newsletter, and school broadcast show to reach students and parents                                             |

---

|               |    |          |                                                                                                                                                                                                                     |
|---------------|----|----------|---------------------------------------------------------------------------------------------------------------------------------------------------------------------------------------------------------------------|
| High School   | PA | New      | To promote social safety, relationships, and awareness of school happenings, the team created a digital trivia competition with answers sourced from information in the morning announcements                       |
| Middle School | WV | Unknown  | To improve student-student relationships and promote school pride, the team organized homeroom-based competitions and fundraisers                                                                                   |
| Middle School | CT | Unknown  | To promote more student voice at their school, the team created a suggestion panel made up of students and staff to incorporate students' ideas and feedback                                                        |
| Middle School | NM | New      | To support their classmates in managing their emotions and academic demands, the team created and facilitated a virtual peer support group on topics like healthy relationships, mental health, and time management |
| Middle School | CO | Existing | To boost morale at the school, the team organized and hosted a dodgeball and soccer tournament between advisories and made videos to involve the whole school                                                       |
| Middle School | MI | New      | To promote safe behaviors online, the team organized and facilitated a cybersafety workshop for 6th graders                                                                                                         |
| Middle School | CO | New      | To increase feelings of motivation at school, the team organized a teacher Jeopardy tournament that they televised during advisories                                                                                |
| Middle School | MO | New      | To support their peers in promoting mental health, the team did a campaign around healthy mindsets, stress management, and hosted a self-care bingo                                                                 |
| PK-8          | KY | New      | To celebrate diversity at their school, the team organized monthly cultural and heritage events about different cultures and backgrounds                                                                            |

---
